# Supplementary material for: Brassinosteroids suppress ethylene-induced fruitlet abscission through LcBZR1/2-mediated transcriptional repression of LcACS1/4 and LcACO2/3 in litchi
Source: PubMed Central journal article supplement (PMC8087802; doi:10.1038/s41438-021-00540-z), 2021-05-01
Supplement: 41438_2021_540_MOESM3_ESM.pdf [file 41438_2021_540_MOESM3_ESM.pdf]

Table S1 Summary of primers used in this study

| Assay                    | Primer sequence (5'-3')                                                             | Restriction Site |
|--------------------------|-------------------------------------------------------------------------------------|------------------|
| Subcellular localization | <i>LcBZR1-GFP-F</i> : caaattecgaccggtATGACATCAGGAGGATCAGGGAGGTTAC                   | <i>Age</i> I     |
|                          | <i>LcBZR1-GFP-R</i> : tgctagtcataccggtTGC GCGCGTCTTGGTAGTGCCAAGTGT                  |                  |
|                          | <i>LcBZR2-GFP-F</i> : caaattecgaccggtATGACGTCAGATGGGGCGACCTCGACGT                   |                  |
|                          | <i>LcBZR2-GFP-R</i> : tgctagtcataccggtAACCTGAGTCTTCCCGTTCCAAGTGTG                   |                  |
| qRT-PCR                  | <i>LcBZR1-qF</i> : CCCCTCCTTCGCCTACCTTTA                                            |                  |
|                          | <i>LcBZR1-qR</i> : CTCACCTTCCCACGGTTTCAC                                            |                  |
|                          | <i>LcBZR2-qF</i> : CAACTTCGCCAACCTTTAATCT                                           |                  |
|                          | <i>LcBZR2-qR</i> : CATTCTTCATTCTACCTCA                                              |                  |
|                          | <i>LcACO2-qF</i> : AAGTCAGTAACTACCCTCCATGCCCTAA                                     |                  |
|                          | <i>LcACO2-qR</i> : GCCATCTGGTTGAGCAATCACACGG                                        |                  |
|                          | <i>LcACO3-qF</i> : TGTCTCATCCCGACCTTGAAACG                                          |                  |
|                          | <i>LcACO3-qR</i> : GGTAGCATTAAACACGGTGCCAGAC                                        |                  |
|                          | <i>LcACS1-qF</i> : CTGACCGCATTGTTATGAGTGGTGGAG                                      |                  |
|                          | <i>LcACS1-qR</i> : GAGCCTTTTCATATGCAGCTTCCAA                                        |                  |
|                          | <i>LcACS4-qF</i> : ACATATGGAGCCGACATTCACGTTG                                        |                  |
|                          | <i>LcACS4-qR</i> : AGCACCTGATTCTGCCGATTT                                            |                  |
|                          | <i>AtACO4-qF</i> : GCGGCATCATCCTCTCTT                                               |                  |
|                          | <i>AtACO4-qR</i> : GTACTTCCCATTGGTTATCACCTC                                         |                  |
|                          | <i>AtACS1-qF</i> : ATGTCTCAGGGTGCATGTGA                                             |                  |
|                          | <i>AtACS1-qR</i> : CCGCCGTACAAATAGATGCC                                             |                  |
|                          | <i>LcEF-1α-qF</i> : CGTGGATTTCGTCGATCTAAC                                           |                  |
|                          | <i>LcEF-1α-qR</i> : CCGCCTGTCAATCTTGGTCAT                                           |                  |
|                          | <i>AtUBQ-qF</i> : GATCTTTGCCGAAAACAATTGGAGGATGGT                                    |                  |
|                          | <i>AtUBQ-qR</i> : CGACTTGTCATTAGAAAAGAAAGAGATAACAGG                                 |                  |
| Transgenic assay         | <i>LcBZR1-35SF</i> : ggactcttgaccatgtaATGACATCAGGAGGATCAGGGAGGTTAC                  | <i>Nco</i> I     |
|                          | <i>LcBZR1-35SR</i> : gtcagatctaccatggtTGC GCGCGTCTTGGTAGTGCCAAGTGT                  |                  |
|                          | <i>LcBZR2-35SF</i> : ggactcttgaccatgtaATGACGTCAGATGGGGCGACCTCGACGT                  |                  |
|                          | <i>LcBZR2-35SR</i> : gtcagatctaccatggtAACCTGAGTCTTCCCGTTCCAAGTGTG                   |                  |
| GUS assay                | <i>Pro<sub>LcBZR1</sub>::GUS-F</i> : tcgacggatccccgggaattcATTTTCTCAACCCGCCAAGTCATG  | <i>EcoR</i> I    |
|                          | <i>Pro<sub>LcBZR1</sub>::GUS-R</i> : gtggactcctcttagaattcCCTCCAACACAAAACCTTCTCTCT   |                  |
|                          | <i>Pro<sub>LcBZR2</sub>::GUS-F</i> : tcgacggatccccgggaattcTTGAGACAAAGTAAACAACAGAGCG |                  |
|                          | <i>Pro<sub>LcBZR2</sub>::GUS-R</i> : gtggactcctcttagaattcCCGACACCTGAAACTCAATCAATCT  |                  |
| EMSA assay               | <i>pGEX-4T-1-LcBZR1-F</i> : gaattccccgggtcgacATGACATCAGGAGGATCAGGGAGGTTAC           | <i>Sal</i> I     |
|                          | <i>pGEX-4T-1-LcBZR1-R</i> : ggcccgtcagtcgacTGC GCGCGTCTTGGTAGTGCCAAGTGT             |                  |
|                          | <i>pGEX-4T-1-LcBZR2-F</i> : gaattccccgggtcgacATGACGTCAGATGGGGCGACCTCGACGT           |                  |
|                          | <i>pGEX-4T-1-LcBZR2-R</i> : ggcccgtcagtcgacAACCTGAGTCTTCCCGTTCCAAGTGTG              |                  |
|                          | <i>LcACO2-probe-F</i> : TAAAGAGAGATAAACTCAATAGATcacacgCGGGCTTAAACCACCAGACAA         |                  |
|                          | <i>LcACO2-probe-R</i> : TTGTCTGGTGGTTTAAAGCCCgctgtgATCTATTGAGTTTATCTCTCTTTA         |                  |
|                          | <i>LcACO2-mprobe-F</i> : TAAAGAGAGATAAACTCAATAGATaaaaaCGGGCTTAAACCACCAGACAA         |                  |
|                          | <i>LcACO2-mprobe-R</i> : TTGTCTGGTGGTTTAAAGCCCgtttttATCTATTGAGTTTATCTCTCTTTA        |                  |
|                          | <i>LcACO3-probe-F</i> : ACTTTTTGATCACGAAAATTGcgaatgTGCCAAGTAC                       |                  |
|                          | <i>LcACO3-probe-R</i> : GTACTTGGCAAcatttgCCAATTTTCGTGATCAAAAAGT                     |                  |
|                          | <i>LcACO3-mprobe-F</i> : ACTTTTTGATCACGAAAATTGggggggTTGCCAAGTAC                     |                  |

|                                                                                                                       |                                                                                                                                                 |                                |
|-----------------------------------------------------------------------------------------------------------------------|-------------------------------------------------------------------------------------------------------------------------------------------------|--------------------------------|
|                                                                                                                       | <i>LcACO3-mprobe-R</i> : G T A C T T G G C A A c c c c c C C A A T T T T C G T G A T C A A A A A A G T                                          |                                |
|                                                                                                                       | <i>LcACSI1-probe-F</i> : T A T T T A C A T T T T T A A C A T T T T C c a c a c g T C C A C C A A G A C C C A C T A G T T                        |                                |
|                                                                                                                       | <i>LcACSI1-probe-R</i> : A A C T A G T G G G T C T T G G T G G A c g t g t G A A A A T G T T A A A A A T G T A A A T A                          |                                |
|                                                                                                                       | <i>LcACSI1-mprobe-F</i> : T A T T T A C A T T T T T A A C A T T T T C a a a a a T C C A C C A A G A C C C A C T A G T T                         |                                |
|                                                                                                                       | <i>LcACSI1-mprobe-R</i> : A A C T A G T G G G T C T T G G T G G A t t t t t G A A A A T G T T A A A A A T G T A A A T A                         |                                |
|                                                                                                                       | <i>LcACS4-probe-F</i> : C A A G T A C C C C T C T C T T C T T C A A G G T A T c g t g c g T G T A T G G A C A A T T T T G T T                   |                                |
|                                                                                                                       | <i>LcACS4-probe-R</i> : A A C A A A A T T G T C C A T A C A c g c a c g A T A C C T T G A A G A A G A G A G G G G T A C T T G                   |                                |
|                                                                                                                       | <i>LcACS4-mprobe-F</i> : C A A G T A C C C C T C T C T T C T T C A A G G T A T a a a a a T G T A T G G A C A A T T T T G T T                    |                                |
|                                                                                                                       | <i>LcACS4-mprobe-R</i> : A A C A A A A T T G T C C A T A C A t t t t t A T A C C T T G A A G A A G A G A G G G G T A C T T G                    |                                |
| Dual-luciferase<br>transient<br>expression<br>assay                                                                   | <i>LcBZR1-pBD-F</i> : t c g c c g a c c g g t a g g c c t A T G A C A T C A G G A G G A T C A G G G A G G T T A C                               | <i>Stu I</i>                   |
|                                                                                                                       | <i>LcBZR1-pBD-R</i> : a a c c a g a g t t a a g g c c t T G C G C G C G T C T T G G T A G T G C C A A G T G T                                   |                                |
|                                                                                                                       | <i>LcBZR2-pBD-F</i> : t c g c c g a c c g g t a g g c c t A T G A C G T C A G A T G G G G C G A C C T C G A C G T                               |                                |
|                                                                                                                       | <i>LcBZR2-pBD-R</i> : a a c c a g a g t t a a g g c c t A A C C T G A G T C T T C C C G G T T C C A A G T G T G                                 |                                |
|                                                                                                                       | <i>LcBZR1-pGreenII 62-SK-F</i> : t a g a a c t a g t g g a t c c A T G A C A T C A G G A G G A T C A G G G A G G T T A C                        | <i>BamHI</i><br><i>HindIII</i> |
|                                                                                                                       | <i>LcBZR1-pGreenII 62-SK-R</i> : c g g t a t c g a t a g c t t T G C G C G C G T C T T G G T A G T G C C A A G T G T                            |                                |
|                                                                                                                       | <i>LcBZR2-pGreenII 62-SK-F</i> : t a g a a c t a g t g g a t c c A T G A C G T C A G A T G G G G C G A C C T C G A C G T                        |                                |
|                                                                                                                       | <i>LcBZR2-pGreenII 62-SK-R</i> : c g g t a t c g a t a g c t t A A C C T G A G T C T T C C C G G T T C C A A G T G T G                          |                                |
|                                                                                                                       | <i>Pro<sub>LcACO2</sub>-LUC-F</i> : t a t a g g c g a a t t g g A A G G A A G A T T T G T T T C A T A A T A A A G T T A G A A T T A T T A T T A | <i>Kpn I</i><br><i>Nco I</i>   |
|                                                                                                                       | <i>Pro<sub>LcACO2</sub>-LUC-R</i> : t t g g c g t c t t c c a t g g T G T T G T T G C T G T T G T T G T A T T A G T T T T C T T G               |                                |
|                                                                                                                       | <i>Pro<sub>LcACO3</sub>-LUC-F</i> : t a t a g g c g a a t t g g T C T A G C A T G T T A A G A G C A T T G C C A A A T A                         |                                |
|                                                                                                                       | <i>Pro<sub>LcACO3</sub>-LUC-R</i> : t t g g c g t c t t c c a t g g C T T T C T T G T T T T C T T T C T A T A A T A T T G T A A A G G T         |                                |
|                                                                                                                       | <i>Pro<sub>LcACSI</sub>-LUC-F</i> : t a t a g g c g a a t t g g G T C A A T C C A G G C T G G A C T G G T T G A                                 |                                |
|                                                                                                                       | <i>Pro<sub>LcACSI</sub>-LUC-R</i> : t t g g c g t c t t c c a t g g C T T T G T G C T T C T A A A A G G T C T T G A A T G T A T                 |                                |
|                                                                                                                       | <i>Pro<sub>LcACS4</sub>-LUC-F</i> : t a t a g g c g a a t t g g A T A C A A T T G A A G T T A T C A C T A G A T A T A A G T C A T T G           |                                |
| <i>Pro<sub>LcACS4</sub>-LUC-R</i> : t t g g c g t c t t c c a t g g T T T G A C A C C C A C C A A G C T A T C T A G C |                                                                                                                                                 |                                |
